# Supplementary material for: Discovery of New Secondary Metabolites from Marine Bacteria Hahella Based on an Omics Strategy
Source: MDPI journal article supplement (doi:10.3390/md20040269), 2022-04-18
Supplement: s1 [file s1]

## Supplementary Materials

### Discovery of New Secondary Metabolites from Marine Bacteria *Hahella* Based on Omics-Strategy

Shufen He<sup>#, 1</sup>, Peishan Li<sup>#, 1</sup>, Jingxuan Wang<sup>1</sup>, Yanzhu Zhang<sup>1</sup>, Hongmei Lu<sup>1</sup>, Liufei Shi<sup>1</sup>, Tao Huang<sup>2</sup>, Weiyan Zhang<sup>1</sup>, Lijian Ding<sup>1</sup>, Shan He<sup>1,3</sup>, Liwei Liu<sup>1,3\*</sup>

#### Author affiliations:

<sup>1</sup> Li Dak Sum Marine Biopharmaceutical Research Center, Department of Marine Pharmacy, College of Food and Pharmaceutical Sciences, Ningbo University, Ningbo, Zhejiang 315832, China;

<sup>2</sup> Department of Food Science and Engineering, College of Food and Pharmaceutical Sciences, Ningbo University, Ningbo 315211, P. R. China;

<sup>3</sup> Ningbo Institute of Marine Medicine, Peking University, Ningbo, Zhejiang 315800, China;

2011085032@nbu.edu.cn(S.H.);196000818@nbu.edu.cn(P.L.);2111085014@nbu.edu.cn(J.W.);2111085060@nbu.edu.cn(H.L.);shiliufei@nbu.edu.cn(L.S.);2011085092@nbu.edu.cn(Y.Z.);huangtao@nbu.edu.cn(T.H.);zhangweiyan@nbu.edu.cn(W.Z.);dinglijian@nbu.edu.cn(L.D.); heshan@nbu.edu.cn(H.S.)

\* Correspondence: Liwei Liu, liuliwei@nbu.edu.cn.

# S. He and P. Li contributed equally to this work.

Liwei Liu: ORCID 0000-0002-0578-1091

## The Table of Contents

|                                                                                                                             |    |
|-----------------------------------------------------------------------------------------------------------------------------|----|
| Table S1 The list of five <i>Hahella</i> genome.....                                                                        | 3  |
| Table S2 The distribution of SMBGCs in six <i>Hahella</i> strains .....                                                     | 3  |
| Table S3 All prodiginine derivatives in <i>Hahella chejuensis</i> NBU794 .....                                              | 4  |
| Table S4 The standard curve of prodigiosin production.....                                                                  | 5  |
| Table S5 The prodigiosin yield in <i>Hahella chejuensis</i> NBU794 grown in different mediums .....                         | 6  |
| Table S6 <sup>1</sup> H NMR and <sup>13</sup> C NMR data of chejuenolide A in CD <sub>3</sub> OD.....                       | 7  |
| Figure S1 The structures of podigiosin, podiginine, chejuenolide A-C and lankacidin C.....                                  | 8  |
| Figure S2 The SMBGCs of ‘Other Types’ identified in <i>Hahella</i> .....                                                    | 9  |
| Figure S3 The RiPPs identified in <i>Hahella</i> .....                                                                      | 10 |
| Figure S4 Maximum likelihood phylogenetic tree of NBU794 and other strains in the genus <i>Hahella</i> ...                  | 11 |
| Figure S5 The SMBGCs predicated in <i>Hahella chejuensis</i> NBU794.....                                                    | 12 |
| Figure S6 Molecular networking of prodiginine derivatives in <i>Hahella chejuensis</i> NBU794 .....                         | 13 |
| Figure S7 Prodigiosin in <i>Hahella chejuensis</i> NBU794 and <i>Hahella chejuensis</i> KCTC 2396.....                      | 14 |
| Figure S8. HPLC of the ethyl acetate extract of <i>H. chejuensis</i> NBU794 grown in M9 medium .....                        | 15 |
| Figure S9 <sup>1</sup> H and <sup>13</sup> C NMR of chejuenolide A recorded at 600 MHz in DMSO- <i>d</i> <sub>6</sub> ..... | 16 |
| Figure S10 HPLC analysis of chejuenolide A-C in <i>Hahella chejuensis</i> NBU794 and KCTC 2396.....                         | 17 |
| Figure S11 Two new prodiginine derivatives in this study and dipyrrolyldipyrromethene prodigiosin ..                        | 18 |

**Table S1.** The list of five *Hahella* genome.

| Strain name                     | Genome Size | GC%  | INSDC             | Sequence level |
|---------------------------------|-------------|------|-------------------|----------------|
| <i>H. chejuensis</i> KCTC 2396  | 7.22        | 53.9 | CP000155.1        | Complete       |
| <i>H. chejuensis</i> . HN01     | 7.13        | 53.9 | JAHMIN000000000.1 | Contig         |
| <i>H. chejuensis</i> . KA22     | 6.96        | 53.9 | CP034836.1        | Complete       |
| <i>H. ganghwensis</i> DSM 17046 | 6.56        | 49.2 | AQXX00000000.1    | Contig         |
| <i>Hahella</i> sp.CCB-MM4       | 6.66        | 49.8 | MRYI00000000.1    | Contig         |

**Table S2.** The distribution of SMBGCs in six *Hahella* strains. *Hahella ganghwensis* DSM 17046, *Hahella chejuensis* KCTC 2396, *Hahella chejuensis*. KA22, *Hahella chejuensis*. HN01, *Hahella* sp.CCB-MM4, and *Hahella chejuensis* NBU794.

| Strain<br>Gene cluster | <i>H. chejuensis</i> HN01 | <i>H.chejuensis</i> . KA22 | <i>H. ganghwensis</i> DSM 17046 | <i>Hahella</i> sp. CCB-MM4 | <i>H. chejuensis</i> KCTC 2396 | Total |
|------------------------|---------------------------|----------------------------|---------------------------------|----------------------------|--------------------------------|-------|
| betalactone            | 1                         | 1                          | 1                               | 1                          | 1                              | 5     |
| NRPS                   | 4                         | 5                          | 1                               | 1                          | 4                              | 15    |
| NRPS/PKS               | 3                         | 4                          | 1                               | 5                          | 4                              | 17    |
| NAGGN                  | 1                         | 1                          | 1                               | 1                          | 1                              | 5     |
| ectoine                | 1                         | 1                          | -                               | 1                          | 1                              | 4     |
| thioamide-NRP          | 1                         | 1                          | -                               | -                          | 1                              | 3     |
| CDPS                   | -                         | -                          | 1                               | -                          | -                              | 1     |
| hserlactone            | -                         | -                          | 1                               | 1                          | -                              | 2     |
| siderophore            | -                         | -                          | 1                               | 1                          | -                              | 2     |
| butyrolactone          | -                         | -                          | 1                               | -                          | -                              | 1     |
| PBDE                   | -                         | -                          | -                               | 1                          | -                              | 1     |
| RiPPs                  | 4                         | 4                          | 1                               | 1                          | 4                              | 14    |
| Total                  | 15                        | 17                         | 9                               | 13                         | 16                             | 70    |

**Table S3.** All prodiginine derivatives in *Hahella chejuensis* NBU794.

| Peak # | Molecular ion (m/z, [M+H] <sup>+</sup> ) | Compound formula                                              | $\lambda$ (nm) | Identification                           |
|--------|------------------------------------------|---------------------------------------------------------------|----------------|------------------------------------------|
| 1      | 296.1759                                 | C <sub>18</sub> H <sub>21</sub> N <sub>3</sub> O              | 534            | 2-methyl-3-propyl-prodiginine            |
| 2      | 340.2015                                 | C <sub>20</sub> H <sub>25</sub> N <sub>3</sub> O <sub>2</sub> | 530            | 2-methyl-3-propyl-4-O-methyl-prodiginine |
| 3      | 354.2171                                 | C <sub>21</sub> H <sub>27</sub> N <sub>3</sub> O <sub>2</sub> | 528            | 2-methyl-3-pentyl-4-O-methyl-prodiginine |
| 4      | 338.2216                                 | C <sub>21</sub> H <sub>27</sub> N <sub>3</sub> O              | 534            | 2-methyl-3-hexyl-prodiginine             |
| 5      | 366.2178                                 | C <sub>23</sub> H <sub>31</sub> N <sub>3</sub> O              | 532            | 2-methyl-3-octyl-prodiginine             |
| 6      | 394.1896                                 | C <sub>25</sub> H <sub>35</sub> N <sub>3</sub> O              | 528            | Undecylprodiginine                       |
| 7      | 324.2067                                 | C <sub>20</sub> H <sub>25</sub> N <sub>3</sub> O              | 534            | prodigiosin                              |
| 8      | 310.1909                                 | C <sub>19</sub> H <sub>23</sub> N <sub>3</sub> O              | 528            | 2-methyl-3-butyl-prodiginine             |
| 9      | 352.2380                                 | C <sub>22</sub> H <sub>29</sub> N <sub>3</sub> O              | 534            | 2-methyl-3-heptyl-prodiginine            |

**Table S4:** The standard curve of prodigiosin production. The different concentrations of prodigiosin solutions are made by proper dilution and injected into Agilent 1260 HPLC for quantification. The UV peak areas at UV 530nm are integrated with Agilent ChemStation software. The prodigiosin standard curve is made by introducing concentration of prodigiosin as ‘x’ and peak area as ‘y’ to form the calculation formular.

| Concentration (mg/mL) | Peak area ( $\lambda_{\text{max}}=530\text{nm}$ ) |
|-----------------------|---------------------------------------------------|
| 0.0390625             | 5353.8                                            |
| 0.078125              | 10224                                             |
| 0.15625               | 20939.7                                           |
| 0.3125                | 34381.9                                           |
| 0.625                 | 68439.8                                           |
| 1.25                  | 97278.2                                           |
| 2.5                   | 154444                                            |

Prodigiosin Standard Curve

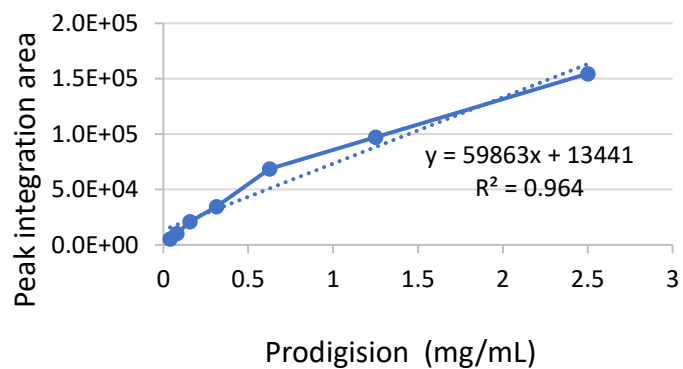

**Table S5.** The prodigiosin yield in *Hahella chejuensis* NBU794 grown in different mediums. ISP4: standard ISP4 medium; ISP4+HP20: standard ISP4 medium added with HP20 beads; ISP4+HP20+Glucose: modified ISP4 medium (starch is replaced with equal amount of glucose) added with HP20 beads; ISP4+HP20+Sucrose: modified ISP4 medium (starch is replaced with equal amount of sucrose) added with HP20 beads. The peak areas are quantified through HPLC analysis at UV 530nm. The yields are calculated based on the peak integration area and prodigiosin standard curve (**Table S5**).

| Name              | Peak integration area | Prodigiosin yield (mg/mL) |
|-------------------|-----------------------|---------------------------|
| ISP4              | 18023.5               | 1.40                      |
| ISP4+HP20         | 218805                | 3.43                      |
| ISP4+HP20+Glucose | 220400.7              | 3.46                      |
| ISP4+HP20+Sucrose | 362447.3              | 5.83                      |

**Table S6.** <sup>1</sup>H NMR and <sup>13</sup>C NMR data of chejuenolide A in CD<sub>3</sub>OD

| Position   | chejuenolide A |                                | chejuenolide A (in this study) |                                |
|------------|----------------|--------------------------------|--------------------------------|--------------------------------|
|            | $\delta_C$     | $\delta_H$ (J in Hz)           | $\delta_C$                     | $\delta_H$ (J in Hz)           |
| <b>1</b>   | 205.6          |                                | 205.6                          |                                |
| <b>2</b>   | 44.9           | 3.40 (1H,dq,10.3,6.6)          | 44.9                           | 3.40(1H, dq,10.3,6.6)          |
| <b>3</b>   | 51.0           |                                | 51.0                           |                                |
| <b>4</b>   | 131.6          | 5.08(1H, d,10.3)               | 131.6                          | 5.08(1H, d,10.3)               |
| <b>5</b>   | 135.5          |                                | 135.5                          |                                |
| <b>6</b>   | 136.7          | 5.74 (1H, d, 15.9),            | 136.8                          | 5.74 (1H, d, 15.9)             |
| <b>7</b>   | 131.3          | 5.36 (1H, dd,15.9,8.0)         | 131.3                          | 5.36 (1H, dd,15.9,8.0)         |
| <b>8</b>   | 74.8           | 4.04(1H, ddd, 10.6, 8.0,4.0)   | 74.8                           | 4.04(1H, ddd, 10.6, 8.0,4.0)   |
| <b>9a</b>  | 36.2           | 2.45 (1H, m)                   | 36.7                           | 2.49 (1H, m)                   |
| <b>9b</b>  |                | 2.17 (1H, ddd, 12.9, 10.6,8.7) |                                | 2.17 (1H, ddd, 12.9, 10.6,8.7) |
| <b>10</b>  | 127.7          | 5.18(1H, t,8.7)                | 127.7                          | 5.18(1H, t,8.7)                |
| <b>11</b>  | 135.7          |                                | 135.7                          |                                |
| <b>12</b>  | 135.3          | 6.04(1H, d,15.7)               | 135.3                          | 6.04(1H, d,15.7)               |
| <b>13</b>  | 129.6          | 5.42(1H, dd,15.7,5.2)          | 129.6                          | 5.42(1H, dd,15.7,5.2)          |
| <b>14</b>  | 71.3           | 4.52 (1H, m)                   | 71.3                           | 4.52 (1H, m)                   |
| <b>15a</b> | 37.4           | 2.72(1H, ddd,14.0,10.3,3.2)    | 37.4                           | 2.72(1H, ddd,14.0,10.3,3.2)    |
| <b>15b</b> |                | 2.55(1H, m)                    |                                | 2.51(1H, m)                    |
| <b>16</b>  | 139.2          | 6.70 (1H, dd, 10.3,5.3)        | 139.2                          | 6.70 (1H, dd, 10.3,5.3)        |
| <b>17</b>  | 140.0          |                                | 140.0                          |                                |
| <b>18</b>  | 16.1           | 0.99 (3H, d, 6.6)              | 16.1                           | 0.99 (3H, d, 6.6)              |
| <b>19</b>  | 12.8           | 1.68(3H, d,1.1)                | 12.8                           | 1.68(3H, d,1.1)                |
| <b>20</b>  | 13.6           | 1.58(3H, s)                    | 13.6                           | 1.58(3H, s)                    |
| <b>21</b>  | 12.5           | 1.71(3H, br s)                 | 12.5                           | 1.72(3H, br s)                 |
| <b>1'</b>  | 172.4          |                                | 172.4                          |                                |
| <b>2'</b>  | 22.7           | 1.93(3H, s)                    | 22.7                           | 1.93(3H, s)                    |

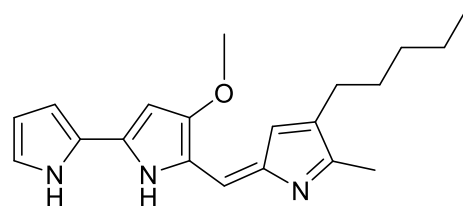

**Prodigiosin**

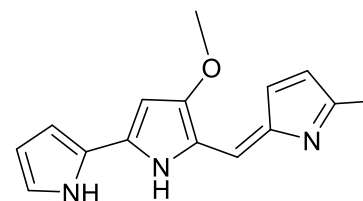

**Prodiginine**

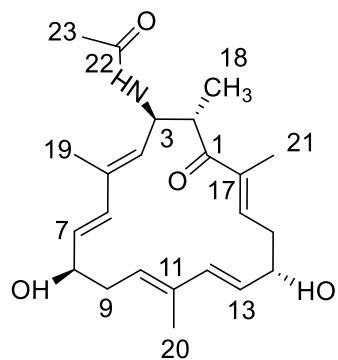

**Chejuenolide A**

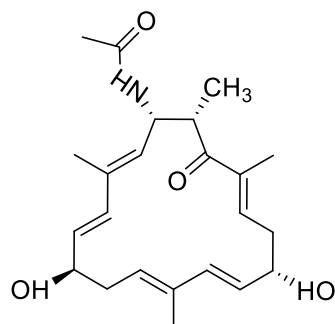

**Chejuenolide B**

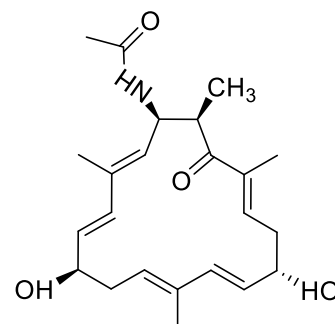

**Chejuenolide C**

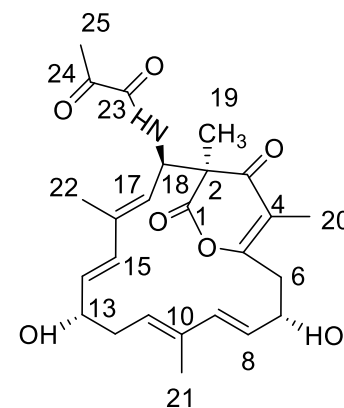

**Lankacidin C**

**Figure S1.** The structures of prodigiosin, prodiginine, chejuenolide A-C, and lankacidin C.





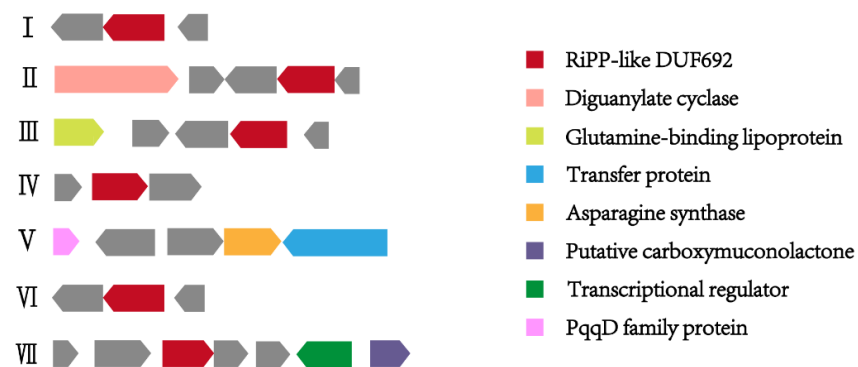

**Figure S3.** The RiPPs (ribosomally synthesized and post-translationally modified peptide biosynthetic gene clusters) identified in *Hahella*. All gene clusters were classified into seven groups based on the gene composition. The functional genes were indicated by squares with different colors.

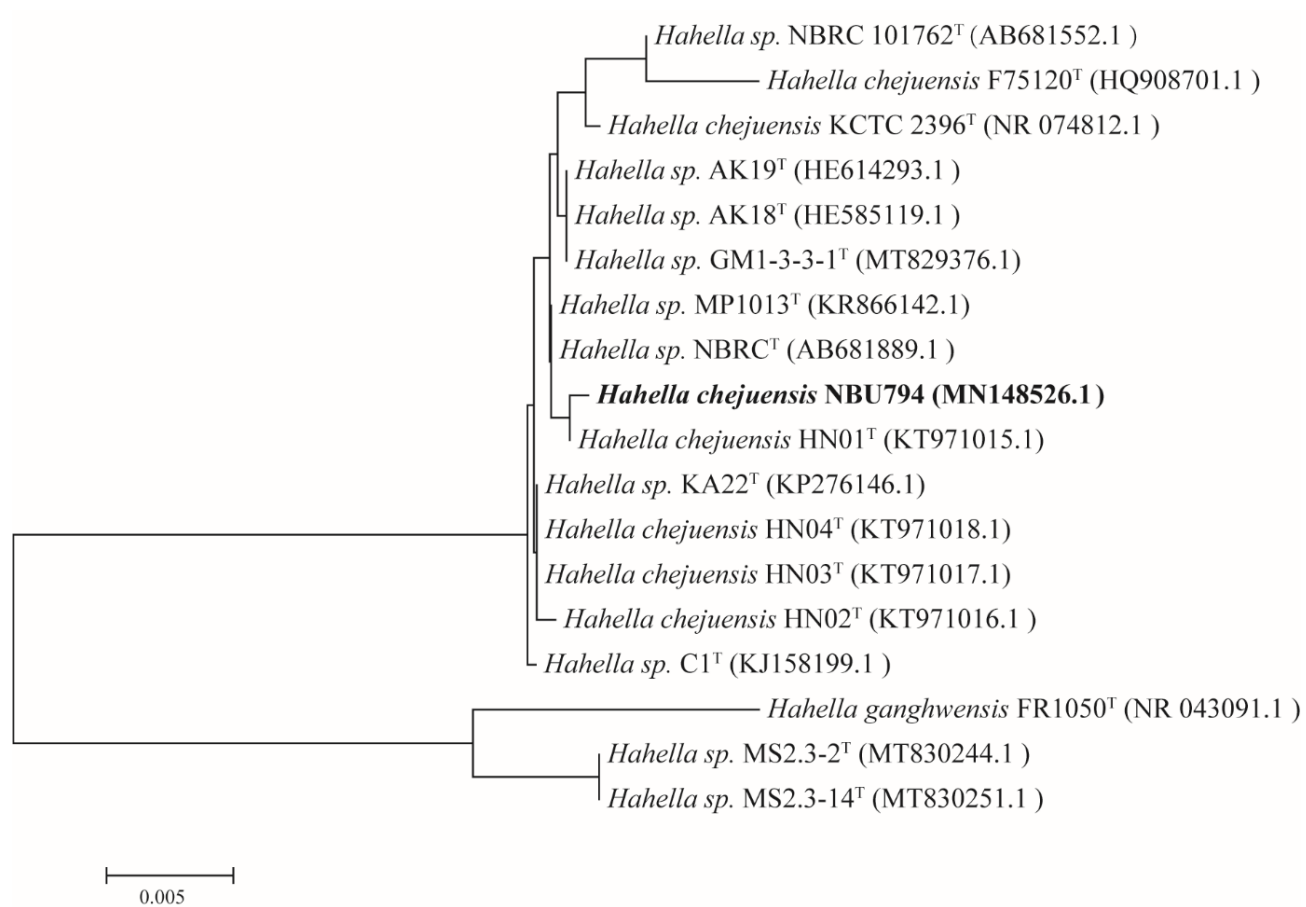

**Figure S4.** Maximum likelihood phylogenetic tree of NBU794 and strains in the genus *Hahella* based on 16S rRNA gene. Bar, 0.005 represents nucleotide substitution rate (Knuc) units. Strains *H. chejuensis* NBU794 from this study are highlighted in bold.

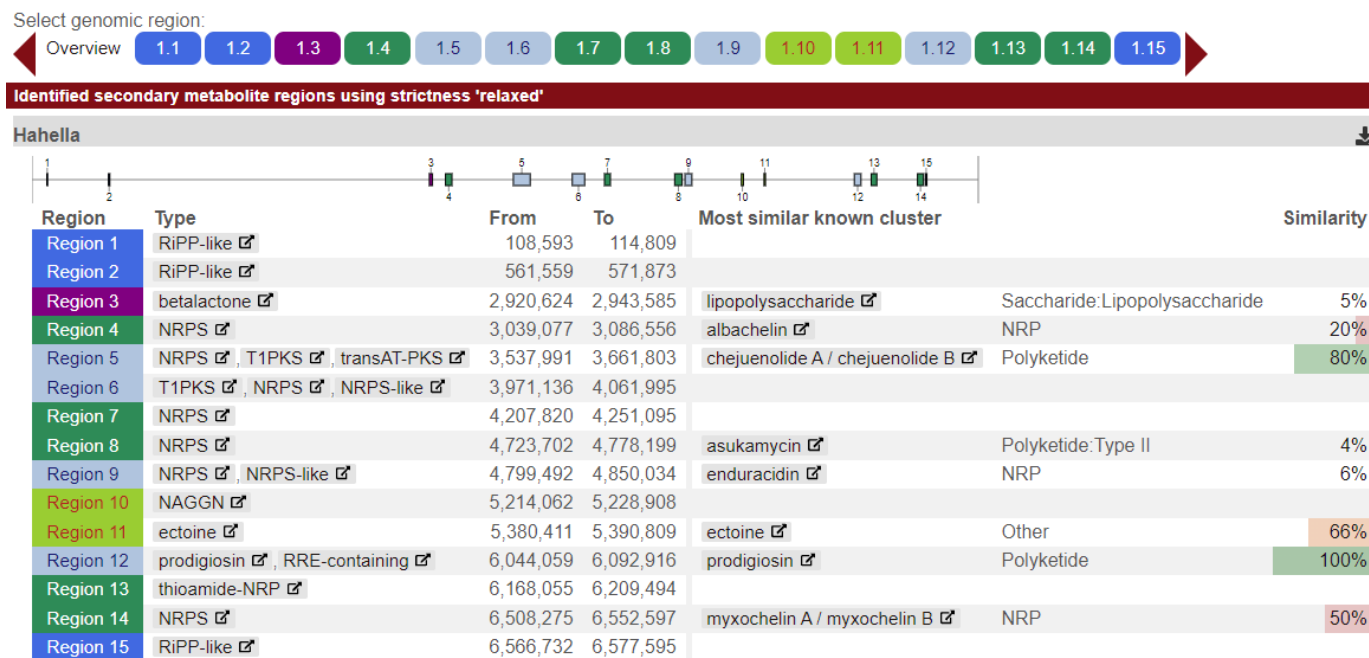

**Figure S5.** The SMBGCs predicated in *Hahella chejuensis* NBU794 with anti-SMASH 6.0.

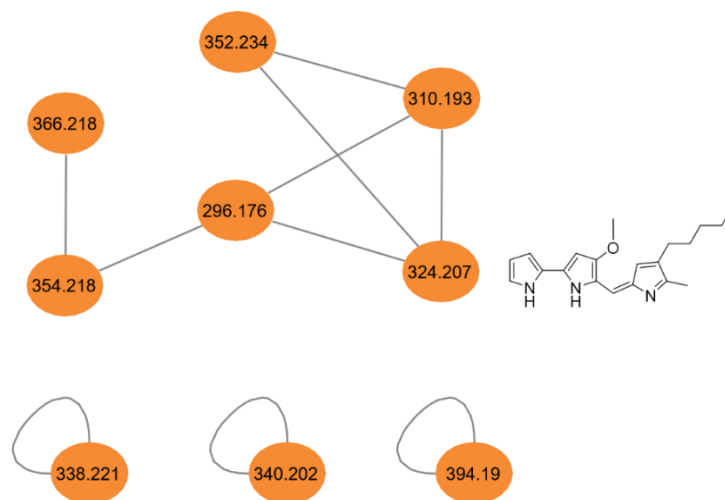

**Figure S6.** Molecular networking of prodiginine derivatives in *Hahella chejuensis* NBU794. Each node indicates one compound with molecular ion inside. The node marked with 324.207 is prodigiosin, and its structure is listed on the right.

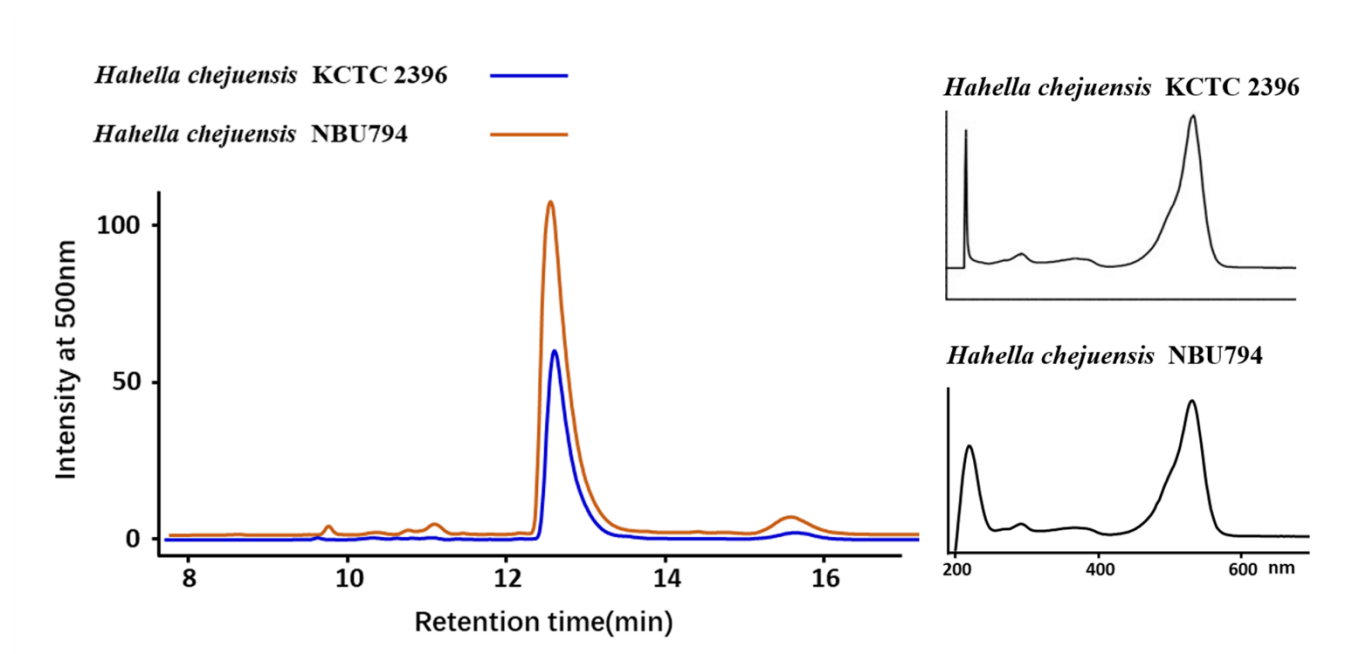

**Figure S7.** HPLC analysis of prodigiosin in *Hahella chejuensis* NBU794 and *Hahella chejuensis* KCTC 2396.

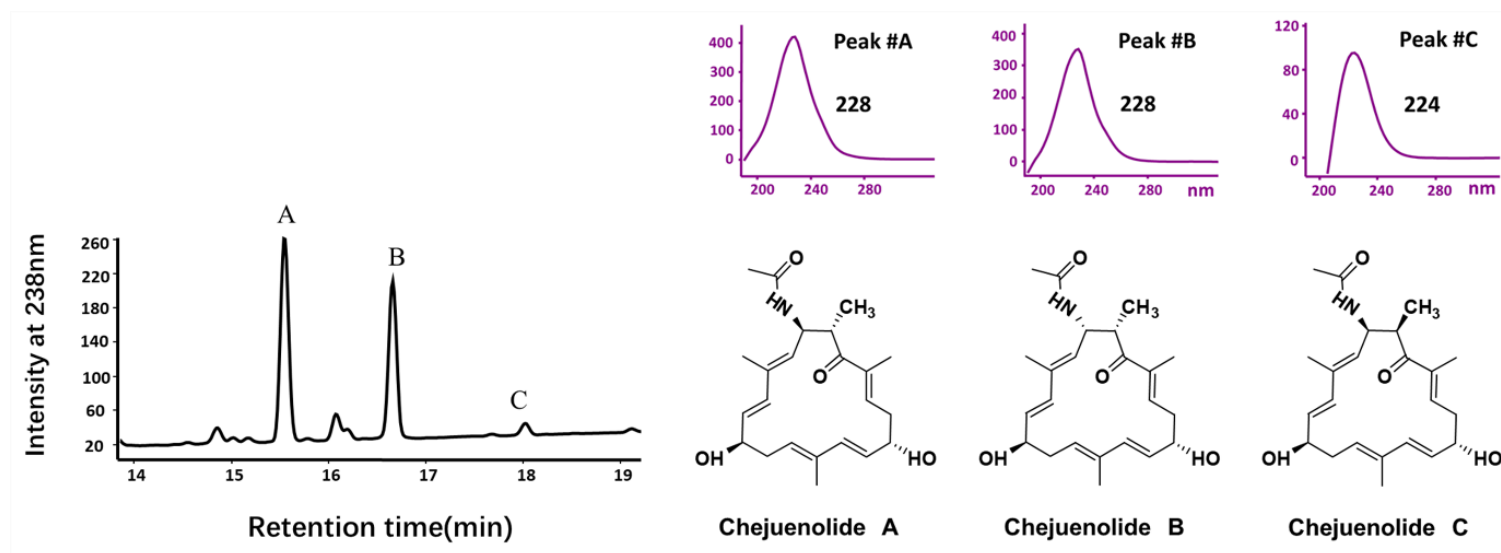

**Figure S8.** HPLC chromatogram of the ethyl acetate extract of *H. chejuensis* NBU794 grown in M9 medium. The UV–Vis spectra of chejuenolide A–C and their structures are listed on the right.





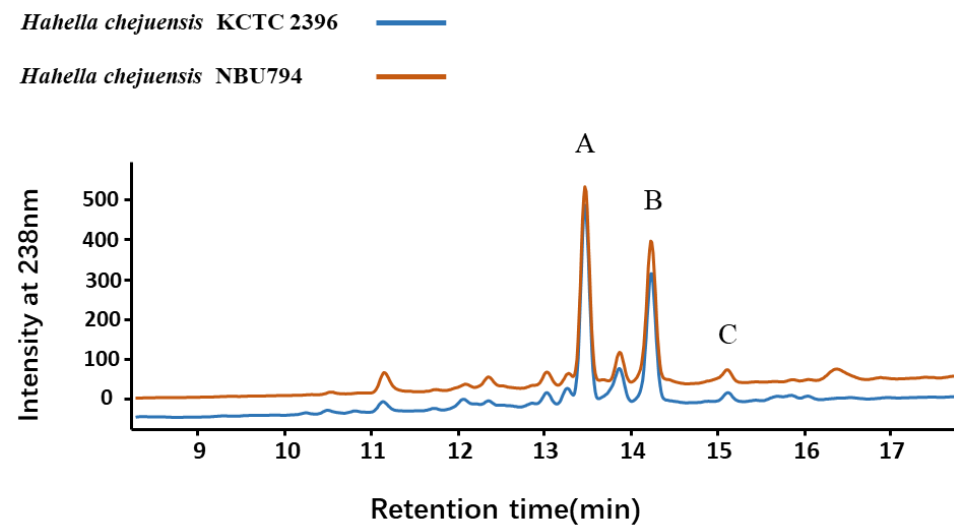

**Figure S10.** HPLC analysis of chejuenolide A-C in *Hahella chejuensis* NBU794 and *Hahella chejuensis* KCTC 2396.

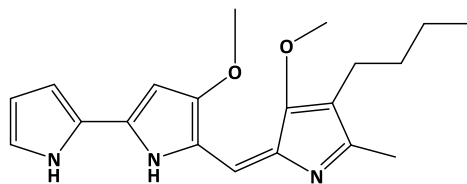

**2-methyl-3-propyl-4-O-methyl-prodiginine**

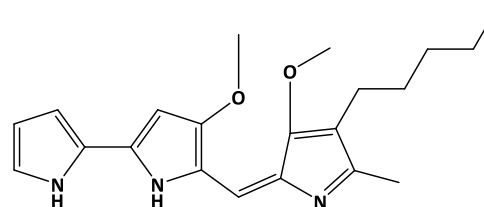

**2-methyl-3-pentyl-4-O-methyl-prodiginine**

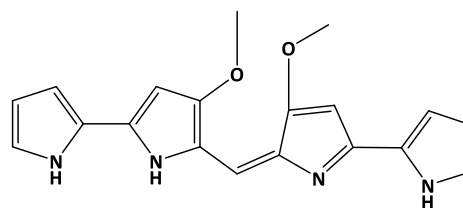

**Dipyrrolyldipyrromethene prodigiosin**

**Figure S11.** Two new prodiginine derivatives in this study and dipyrrolyldipyrromethene prodigiosin.
